# Supplementary material for: A novel mouse wound model for scar tissue formation in abdominal muscle wall
Source: PubMed Central journal article supplement — J Vet Med Sci. 2021 Nov 1;83(12):1933–42. doi: 10.1292/jvms.21-0464 (PMC8762401; doi:10.1292/jvms.21-0464), 2021-11-01
Supplement: jvms-83-1933-s001.pdf [file jvms-83-1933-s001.pdf]

**Supplementary Table 1. Body weight and hematological data.**

|                                           | Day 0      | Day 7                | Day 14               | Day 21               |
|-------------------------------------------|------------|----------------------|----------------------|----------------------|
| Dorsal skin model                         |            |                      |                      |                      |
| Body weight (g)<br>(vs. Day 0)            | 16.8 ± 1.1 | 17.3 ± 1.6<br>(103%) | 17.3 ± 1.6<br>(103%) | 19.0 ± 1.6<br>(113%) |
| WBC (x10 <sup>2</sup> /μL)<br>(vs. Day 0) | 59 ± 9     | 52 ± 20<br>(80%)     | 54 ± 13<br>(91%)     | 50 ± 4<br>(84%)      |
| RBC (x10 <sup>4</sup> /μL)<br>(vs. Day 0) | 928±21     | 938±21<br>(101%)     | 978±90<br>(105%)     | 979±39<br>(105%)     |
| Abdominal model                           |            |                      |                      |                      |
| Body weight (g)<br>(vs. Day 0)            | 18.7 ± 1.1 | 18.2 ± 1.3<br>(97%)  | 20.5 ± 1.3<br>(109%) | 21.2 ± 1.2<br>(113%) |
| WBC (x10 <sup>2</sup> /μL)<br>(vs. Day 0) | 40 ± 10    | 56 ± 12<br>(140%)    | 59 ± 17<br>(148%)    | 49 ± 12<br>(123%)    |
| RBC (x10 <sup>4</sup> /μL)<br>(vs. Day 0) | 1031 ± 23  | 900 ± 74<br>(87%)    | 871 ± 54<br>(84%)    | 1091 ± 94<br>(106%)  |

Mean ± S.D.
